# Supplementary material for: Position-Posture Control of Multilegged Walking Robot Based on Kinematic Correction
Source: Hindawi journal article supplement (doi:10.1155/2020/8896396), 2020-09-25
Supplement: f1 [file 8896396.f1.doc]

## Supplementary Materials

Inverse Kinematics Analysis

Foot-end coordinates under coordinate system {}:

(1)

(2)

Angle of root joint:

(3)

(4)

(5)

Angle of hip joint:

(6)

(7)

(8)

Angle of knee joint:

(9)
